# Supplementary material
Source: Springer Nature journal article supplement (https://www.springermedizin.de/resource/supplementary/13058_2010_2537_MOESM8_ESM.pdf/9701644)
Supplement: MOESM8 [file 9701644]

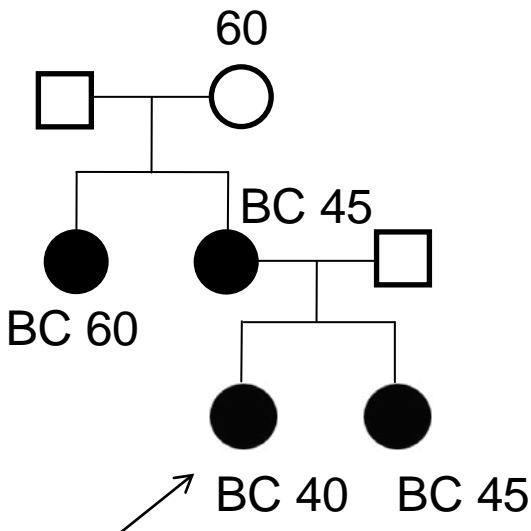

| ER status           | Before Mutation test |              | Mutation test Negative* |              |
|---------------------|----------------------|--------------|-------------------------|--------------|
|                     | <i>BRCA1</i>         | <i>BRCA2</i> | <i>BRCA1</i>            | <i>BRCA2</i> |
| Unknown             | 0.16                 | 0.21         | 0.07                    | 0.06         |
| Proband ER-negative | 0.35                 | 0.17         | 0.17                    | 0.05         |
| Proband ER-positive | 0.04                 | 0.24         | 0.01                    | 0.06         |
| Unknown             | 0.16                 | 0.21         | 0.07                    | 0.06         |
| Mother ER-negative  | 0.38                 | 0.16         | 0.18                    | 0.05         |
| Mother ER-positive  | 0.05                 | 0.24         | 0.02                    | 0.06         |

\*sensitivity 70% for *BRCA1* and 80% for *BRCA2* mutations

Boxes indicate that genotype-specific risk is less than 10% when ER status is unknown but higher than 10% where ER status is known.
